# Supplementary material
Source: PubMed Central journal article supplement (PMC2949272)
Supplement: NIHMS203279-supplement-4.pdf [file NIHMS203279-supplement-4.pdf]

## References for NCA connectivity matrix

| Number | Reference                                                                                   |
|--------|---------------------------------------------------------------------------------------------|
| aa     | (Horton et al. 2003)                                                                        |
| ab     | (Herzog et al. 2004)                                                                        |
| ac     | (Mascaro et al. 1998)                                                                       |
| ad     | (Banine et al. 2000)                                                                        |
| ae     | (Amemiya-Kudo et al. 2002)                                                                  |
| af     | (Le et al. 2005)                                                                            |
| ag     | (Mandard et al. 2004)                                                                       |
| ah     | (Hiraku Ono et al. 2003)                                                                    |
| ai     | (Katsumi Iizuka et al. 2004)                                                                |
| aj     | (Chu et al. 2004)                                                                           |
| ak     | (Peters et al. 2005)                                                                        |
| al     | (Cherkaoui-Malki et al. 2001)                                                               |
| am     | (Stier et al. 1998)                                                                         |
| an     | (Mittelstadt and Ashwell 2003)                                                              |
| ao     | (Kersten et al. 2001)                                                                       |
| ap     | (Iritani 2000)                                                                              |
| aq     | (Xu et al. 2004)                                                                            |
| ar     | (Schoneveld et al. 2004)                                                                    |
| as     | (Shingu and Bornstein 1994)                                                                 |
| at     | <a href="http://www.sladeklab.ucr.edu/hnf43.pdf">http://www.sladeklab.ucr.edu/hnf43.pdf</a> |
| au     | (Leone et al. 1999)                                                                         |
| av     | (Trautwein et al. 1996)                                                                     |
| aw     | (Mueller 1992)                                                                              |
| ax     | (Ruminy et al. 2001)                                                                        |
| ay     | (Ronggai Sun et al. 2001)                                                                   |
| az     | (Hinoi et al. 2002)                                                                         |
| ba     | (Martelli et al. 1994)                                                                      |
| bb     | (Moya-Garcia et al. 2005)                                                                   |
| bc     | (J D Horton et al. 1998)                                                                    |
| bd     | (Lu and Cidlowski 2005)                                                                     |
| be     | (Cortes-Canteli et al. 2004)                                                                |
| bf     | (Guo et al. 2006)                                                                           |
| bg     | (Leclerc et al. 2004)                                                                       |
| bh     | (Odom et al. 2004)                                                                          |
| bi     | (Seckl and Walker 2001)                                                                     |
| bj     | (Lin Ma et al. 2006)                                                                        |
| bk     | (Friedman et al. 2004)                                                                      |
| bl     | (Harmancey et al. 2007)                                                                     |
| bm     | (Rebouissou et al. 2007)                                                                    |

|    |                                  |
|----|----------------------------------|
| bn | (Hayhurst et al. 2001)           |
| bo | (K Tamura et al. 2006)           |
| bp | (Tien et al. 2003)               |
| bq | (Shishido et al. 2003)           |
| br | (Spear et al. 2006)              |
| bs | (You et al. 2003)                |
| bt | (Ceshi Chen et al. 2004)         |
| bu | (Quinet et al. 2006)             |
| bv | (Maxwell et al. 2003)            |
| bw | (Edwards et al. 2002)            |
| bx | (Ide et al. 2003)                |
| by | (Repa and DJ Mangelsdorf 2003)   |
| bz | (Peet et al. 1998)               |
| ca | (Mitro et al. 2007)              |
| cb | (Steffensen and Gustafsson 2004) |
| cc | (Krook 2006)                     |
| cd | (Fahrner et al. 1993)            |
| ce | (Griffo et al. 1993)             |
| cf | (Gotoh et al. 1997)              |
| cg | (Thomas P. Burris et al. 2005)   |

## Bibliography

“HNF4{alpha} target genes.” <http://www.sladeklab.ucr.edu/hnf43.pdf>.

Amemiya-Kudo, Michiyo et al. 2002. “Transcriptional activities of nuclear SREBP-1a, -1c, and -2 to different target promoters of lipogenic and cholesterologenic genes.” *J. Lipid Res.* 43:1220-1235.

Banine, Fatima, Christophe Gangneux, Louis Mercier, Alphonse Le Cam, and Jean-Philippe Salier. 2000. “Positive and negative elements modulate the promoter of the human liver-specific alpha2-HS-glycoprotein gene.” *European Journal of Biochemistry* 267:1214-1222.

Burris, Thomas P. et al. 2005. “The hypolipidemic natural product guggulsterone is a promiscuous steroid receptor ligand.” *Mol Pharmacol* 67:948-954.

Chen, Ceshi et al. 2004. “Regulation of KLF5 involves the Sp1 transcription factor in human epithelial cells.” *Gene* 330:133-142.

Cherkaoui-Malki, M et al. 2001. “Identification of novel peroxisome proliferator-activated receptor alpha (PPARalpha) target genes in mouse liver using cDNA microarray analysis.” *Gene Expression* 9:291-304.

Chu, Ruiyin et al. 2004. “Protein profiling of mouse livers with peroxisome proliferator-activated receptor {alpha} activation.” *Mol. Cell. Biol.* 24:6288-6297.

- Cortes-Canteli, Marta, Mechthild Wagner, Wilhelm Ansorge, and Ana Perez-Castillo. 2004. "Microarray analysis supports a role for CCAAT/enhancer-binding protein- $\beta$  in brain injury." *J. Biol. Chem.* 279:14409-14417.
- Edwards, Peter A., Matthew A. Kennedy, and Puiying A. Mak. 2002. "LXRs; : Oxysterol-activated nuclear receptors that regulate genes controlling lipid homeostasis." *Vascular Pharmacology* 38:249-256.
- Fahrner, Joachim et al. 1993. "Identification and functional characterization of regulatory elements of the glutamine synthetase gene from rat liver." *European Journal of Biochemistry* 213:1067-1073.
- Friedman, Joshua R. et al. 2004. "Orthogonal analysis of C/EBP $\beta$  targets in vivo during liver proliferation." *Proceedings of the National Academy of Sciences* 101:12986-12991.
- Gotoh, Tomomi, Shoab Chowdhury, Masaki Takiguchi, and Masataka Mori. 1997. "The glucocorticoid-responsive gene cascade. Activation of the rat arginase gene through induction of C/EBP $\beta$ ." *J. Biol. Chem.* 272:3694-3698.
- Griffo, G et al. 1993. "HNF4 and HNF1 as well as a panel of hepatic functions are extinguished and reexpressed in parallel in chromosomally reduced rat hepatoma-human fibroblast hybrids." *J. Cell Biol.* 121:887-898.
- Guo, Lei et al. 2006. "Differences in hepatotoxicity and gene expression profiles by anti-diabetic PPAR  $\gamma$  agonists on rat primary hepatocytes and human HepG2 cells." *Molecular Diversity* 10:349-360.
- Harmancey, Romain, Jean-Michel Senard, Philippe Rouet, Atul Pathak, and Fatima Smih. 2007. "Adrenomedullin inhibits adipogenesis under transcriptional control of insulin." *Diabetes* 56:553-563.
- Hayhurst, Graham P., Ying-Hue Lee, Gilles Lambert, Jerrold M. Ward, and Frank J. Gonzalez. 2001. "Hepatocyte nuclear factor 4 $\alpha$  (nuclear receptor 2a1) is essential for maintenance of hepatic gene expression and lipid homeostasis." *Mol. Cell. Biol.* 21:1393-1403.
- Herzog, Birger, Robert K. Hall, Xiaohui L. Wang, Mary Waltner-Law, and Daryl K. Granner. 2004. "Peroxisome proliferator-activated receptor  $\gamma$  coactivator-1 $\alpha$ , as a transcription amplifier, is not essential for basal and hormone-induced phosphoenolpyruvate carboxykinase gene expression." *Mol Endocrinol* 18:807-819.
- Hinoi, Takao et al. 2002. "CDX2 regulates liver intestine-cadherin expression in normal and malignant colon epithelium and intestinal metaplasia." *Gastroenterology* 123:1565-1577.
- Horton, J D et al. 1998. "Activation of cholesterol synthesis in preference to fatty acid synthesis in liver and adipose tissue of transgenic mice overproducing sterol regulatory element-binding protein-2." *Journal of Clinical Investigation* 101:2331-2339.

- Horton, Jay D. et al. 2003. "Combined analysis of oligonucleotide microarray data from transgenic and knockout mice identifies direct SREBP target genes." *Proceedings of the National Academy of Sciences* 100:12027-12032.
- Ide, Tomohiro et al. 2003. "Cross-talk between peroxisome proliferator-activated receptor (PPAR) {alpha} and liver X receptor (LXR) in nutritional regulation of fatty acid metabolism. II. LXRs suppress lipid degradation gene promoters through inhibition of PPAR signaling." *Mol Endocrinol* 17:1255-1267.
- Iizuka, Katsumi, Richard K. Bruick, Guosheng Liang, Jay D. Horton, and Kosaku Uyeda. 2004. "Deficiency of carbohydrate response element-binding protein (ChREBP) reduces lipogenesis as well as glycolysis." *Proceedings of the National Academy of Sciences* 101:7281-7286.
- Iritani, N. 2000. "Nutritional and insulin regulation of leptin gene expression." *Current opinion in clinical nutrition and metabolic care* 3:275-9.
- Kersten, S et al. 2001. "The peroxisome proliferator-activated receptor {alpha} regulates amino acid metabolism." *FASEB J.* 15:1971-1978.
- Krook, A. 2006. "Can the liver X receptor work its magic in skeletal muscle too?." *Diabetologia* 49:819-821.
- Le, Phillip Phuc et al. 2005. "Glucocorticoid receptor-dependent gene regulatory networks." *PLoS Genetics* 1:e16.
- Leclerc, N et al. 2004. "Gene expression profiling of glucocorticoid-inhibited osteoblasts." *J Mol Endocrinol* 33:175-193.
- Leone, Teresa C., Carla J. Weinheimer, and Daniel P. Kelly. 1999. "A critical role for the peroxisome proliferator-activated receptor alpha (PPARalpha) in the cellular fasting response: The PPARalpha -null mouse as a model of fatty acid oxidation disorders." *Proceedings of the National Academy of Sciences* 96:7473-7478.
- Lu, Nick Z., and John A. Cidlowski. 2005. "Translational regulatory mechanisms generate N-terminal glucocorticoid receptor isoforms with unique transcriptional target genes." *Molecular Cell* 18:331-342.
- Ma, Lin, Luke N. Robinson, and Howard C. Towle. 2006. "ChREBP\**Mlx* is the principal mediator of glucose-induced gene expression in the liver." *J. Biol. Chem.* 281:28721-28730.
- Mandard, S., M. Müller, and S. Kersten. 2004. "Peroxisome proliferator-activated receptor target genes." *Cellular and Molecular Life Sciences (CMLS)* 61:393-416.
- Martelli, Alberto M. et al. 1994. "Phosphoinositide signaling in nuclei of friend cells: phospholipase C {beta} down-regulation is related to cell differentiation." *Cancer Res* 54:2536-2540.
- Mascaro, Cristina et al. 1998. "Control of human muscle-type carnitine palmitoyltransferase I gene transcription by peroxisome proliferator-activated receptor." *J. Biol. Chem.* 273:8560-8563.

- Maxwell, Kara N., Raymond E. Soccio, Elizabeth M. Duncan, Ephraim Sehayek, and Jan L. Breslow. 2003. "Novel putative SREBP and LXR target genes identified by microarray analysis in liver of cholesterol-fed mice." *J. Lipid Res.* 44:2109-2119.
- Mitro, Nico et al. 2007. "The nuclear receptor LXR is a glucose sensor." *Nature* 445:219-223.
- Mittelstadt, Paul R., and Jonathan D. Ashwell. 2003. "Disruption of glucocorticoid receptor exon 2 yields a ligand-responsive C-terminal fragment that regulates gene expression." *Mol Endocrinol* 17:1534-1542.
- Moya-Garcia, Aurelio A., Miguel Angel Medina, and Francisca Sanchez-Jimenez. 2005. "Mammalian histidine decarboxylase: from structure to function." *BioEssays* 27:57-63.
- Mueller, C R. 1992. "The down-regulation of albumin transcription during regeneration is due to the loss of HNF-1 and the D-site transcription factors." *DNA and cell biology* 11:559-66.
- Odom, Duncan T. et al. 2004. "Control of pancreas and liver gene expression by HNF transcription factors." *Science* 303:1378-1381.
- Ono, Hiraku et al. 2003. "Hepatic Akt activation induces marked hypoglycemia, hepatomegaly, and hypertriglyceridemia with sterol regulatory element binding protein involvement." *Diabetes* 52:2905-2913.
- Peet, Daniel J. et al. 1998. "Cholesterol and bile acid metabolism are impaired in mice lacking the nuclear oxysterol receptor LXR[alpha]." *Cell* 93:693-704.
- Peters, Jeffrey, Connie Cheung, and Frank Gonzalez. 2005. "Peroxisome proliferator-activated receptor- $\alpha$  and liver cancer: where do we stand?." *Journal of Molecular Medicine* 83:774-785.
- Quinet, Elaine M. et al. 2006. "Liver X receptor (LXR)- $\beta$  regulation in LXR $\alpha$ -deficient mice: Implications for therapeutic targeting." *Mol Pharmacol* 70:1340-1349.
- Rebouissou, Sandra et al. 2007. "HNF1 $\alpha$  inactivation promotes lipogenesis in human hepatocellular adenoma independently of SREBP-1 and carbohydrate-response element-binding protein (ChREBP) activation." *J. Biol. Chem.* 282:14437-14446.
- Repa, JJ, and DJ Mangelsdorf. 2003. "The role of orphan nuclear receptors in the regulation of cholesterol homeostasis."  
<http://arjournals.annualreviews.org/doi/abs/10.1146%2Fannurev.cellbio.16.1.459>  
(Accessed May 19, 2008).
- Ruminy, P. et al. 2001. "Gene transcription in hepatocytes during the acute phase of a systemic inflammation: from transcription factors to target genes." *Inflammation Research* 50:383-390.
- Schoneveld, Onard J.L.M., Ingrid C. Gaemers, and Wouter H. Lamers. 2004. "Mechanisms of glucocorticoid signalling." *Biochimica et Biophysica Acta (BBA) - Gene Structure and Expression* 1680:114-128.

- Seckl, Jonathan R., and Brian R. Walker. 2001. "Minireview: 11 $\beta$ -hydroxysteroid dehydrogenase type 1-- A tissue-specific amplifier of glucocorticoid action." *Endocrinology* 142:1371-1376.
- Shingu, T, and P Bornstein. 1994. "Overlapping Egr-1 and Sp1 sites function in the regulation of transcription of the mouse thrombospondin 1 gene." *J. Biol. Chem.* 269:32551-32557.
- Shishido, Shoichiro et al. 2003. "Hydrogen peroxide overproduction in megamitochondria of troglitazone-treated human hepatocytes." *Hepatology* 37:136-147.
- Spear, B, L. Jin, S. Ramasamy, and A. Dobierzewska. 2006. "Transcriptional control in the mammalian liver: liver development, perinatal repression, and zonal gene regulation." *Cellular and Molecular Life Sciences (CMLS)* 63:2922-2938.
- Steffensen, Knut R., and Jan-Ake Gustafsson. 2004. "Putative metabolic effects of the liver X receptor (LXR)." *Diabetes* 53:S36-42.
- Stier, H et al. 1998. "Maturation of peroxisomes in differentiating human hepatoblastoma cells (HepG2): possible involvement of the peroxisome proliferator-activated receptor  $\alpha$  (PPAR $\alpha$ )." *Differentiation* 64:55-66.
- Sun, Ronggai, Xinming Chen, and Vincent W. Yang. 2001. "Intestinal-enriched Kruppel-like factor (Kruppel-like factor 5) is a positive regulator of cellular proliferation." *J. Biol. Chem.* 276:6897-6900.
- Tamura, K, A Ono, T Miyagishima, T Nagao, and T Urushidani. 2006. "Profiling of gene expression in rat liver and rat primary cultured hepatocytes treated with peroxisome proliferators." *Journal of Toxicological Sciences* 31:471-490.
- Tien, Eric S, Joshua P Gray, Jeffrey M Peters, and John P Vanden Heuvel. 2003. "Comprehensive gene expression analysis of peroxisome proliferator-treated immortalized hepatocytes: identification of peroxisome proliferator-activated receptor alpha-dependent growth regulatory genes." *Cancer research* 63:5767-80.
- Trautwein, Christian et al. 1996. "C/EBP-beta/LAP controls down-regulation of albumin gene transcription during liver regeneration." *J. Biol. Chem.* 271:22262-22270.
- Xu, Jun et al. 2004. "Peroxisomal proliferator-activated receptor {alpha} deficiency diminishes insulin-responsiveness of gluconeogenic/glycolytic/pentose gene expression and substrate cycle flux." *Endocrinology* 145:1087-1095.
- You, Kyung-Ran, Ming-Jie Liu, Xue-Ji Han, Zee-Won Lee, and Dae-Ghon Kim. 2003. "Transcriptional regulation of the human transferrin gene by GADD153 in hepatoma cells." *Hepatology* 38:745-755.
