# Supplementary material
Source: PubMed Central journal article supplement (PMC2949272)

**a**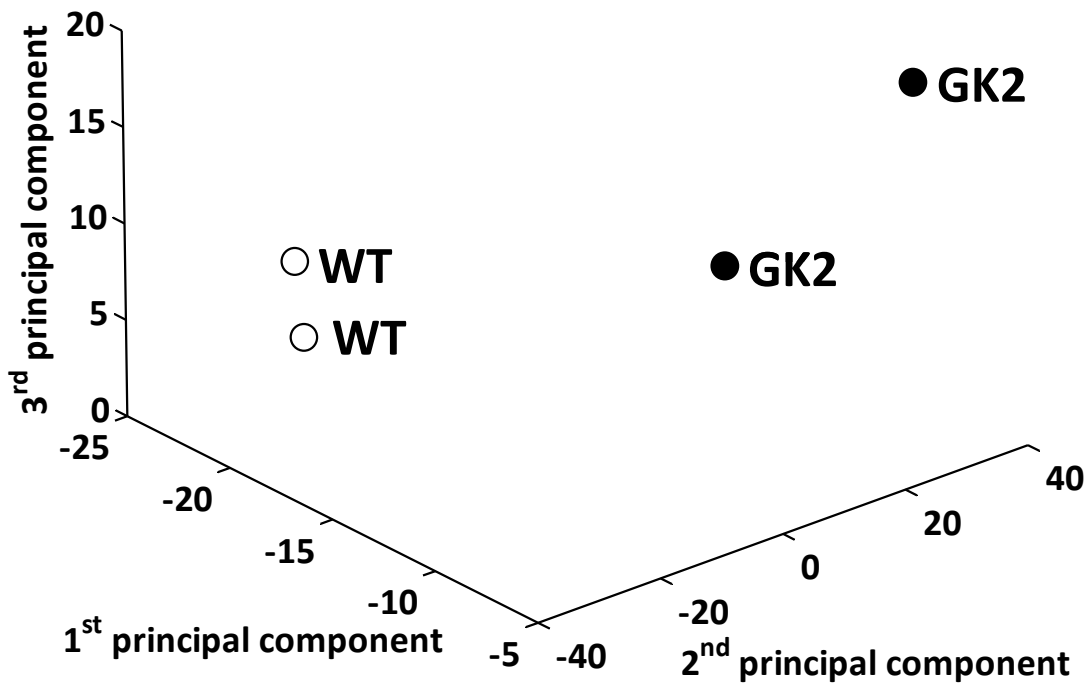**b**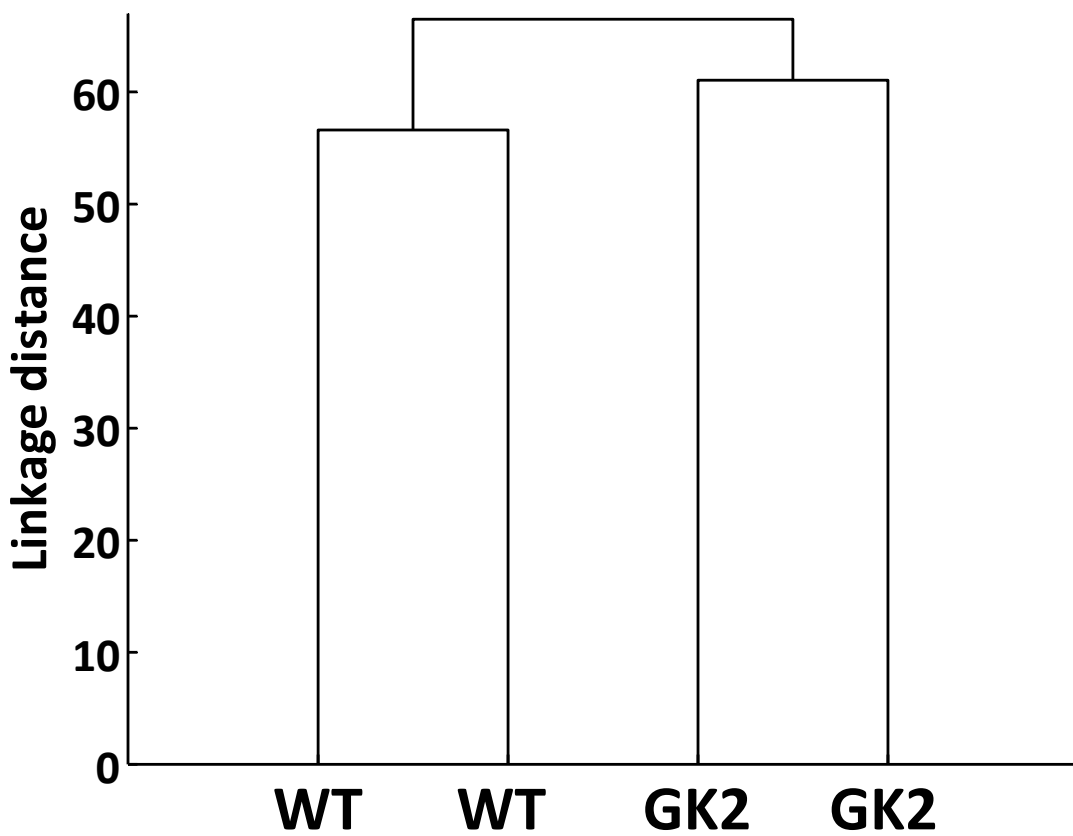

Supplement: NIHMS203279-supplement-1.pdf [file NIHMS203279-supplement-1.pdf]
